1 FULL TITLE: Reference trait analysis reveals correlations between gene expression  
2 and quantitative traits in disjoint samples

3

4 SHORT TITLE: Reference traits for systems genetics in disjoint samples

5

6 AUTHORS: Daniel A. Skelly<sup>1</sup>, Narayanan Raghupathy<sup>1</sup>, Raymond F. Robledo<sup>1</sup>, Joel H.  
7 Graber<sup>1,2</sup>, Elissa J. Chesler<sup>1,3</sup>

8

9 AFFILIATIONS:

10 <sup>1</sup>The Jackson Laboratory, Bar Harbor, ME 04609, USA

11 <sup>2</sup>MDI Biological Laboratory, Bar Harbor, ME 04609, USA

12 <sup>3</sup>Corresponding author:

13 Elissa J. Chesler

14 The Jackson Laboratory

15 600 Main St.

16 Bar Harbor ME 04609

17 207-288-6453

18 [elissa.chesler@jax.org](mailto:elissa.chesler@jax.org)

19

20 ABSTRACT

21

22 Systems genetic analysis of complex traits involves the integrated analysis of  
23 genetic, genomic, and disease related measures. However, these data are often  
24 collected separately across multiple study populations, rendering direct correlation  
25 of molecular features to complex traits impossible. Recent transcriptome-wide  
26 association studies (TWAS) have harnessed gene expression quantitative trait loci  
27 (eQTL) to associate unmeasured gene expression with a complex trait in genotyped  
28 individuals, but this approach relies primarily on strong eQTLs. We propose a  
29 simple and powerful alternative strategy for correlating independently obtained  
30 sets of complex traits and molecular features. In contrast to TWAS, our approach  
31 gains precision by correlating complex traits through a common set of continuous  
32 phenotypes instead of genetic predictors, and can identify transcript-trait  
33 correlations for which the regulation is not genetic. In our approach, a set of  
34 multiple quantitative “reference” traits is measured across all individuals, while  
35 measures of the complex trait of interest and transcriptional profiles are obtained in  
36 disjoint sub-samples. A conventional multivariate statistical method, canonical  
37 correlation analysis, is used to relate the reference traits and traits of interest in  
38 order to identify gene expression correlates. We evaluate power and sample size  
39 requirements of this methodology, as well as performance relative to other  
40 methods, via extensive simulation and analysis of a behavioral genetics experiment  
41 in 258 Diversity Outbred mice involving two independent sets of anxiety-related  
42 behaviors and hippocampal gene expression. After splitting the dataset and hiding

43 one set of anxiety-related traits in half the samples, we identified transcripts  
44 correlated with the hidden traits using the other set of anxiety-related traits and  
45 exploiting the highest canonical correlation ( $R = 0.69$ ) between the trait datasets.  
46 We demonstrate that this approach outperforms TWAS in identifying associated  
47 transcripts. Together, these results demonstrate the validity, reliability, and power  
48 of the reference trait method for identifying relations between complex traits and  
49 their molecular substrates.  
50

51 AUTHOR SUMMARY

52

53 Systems genetics exploits natural genetic variation and high-throughput  
54 measurements of molecular intermediates to dissect genetic contributions to  
55 complex traits. An important goal of this strategy is to correlate molecular features,  
56 such as transcript or protein abundance, with complex traits. For practical,  
57 technical, or financial reasons, it may be impossible to measure complex traits and  
58 molecular intermediates on the same individuals. Instead, in some cases these two  
59 sets of traits may be measured on independent cohorts. We outline a method,  
60 reference trait analysis, for identifying molecular correlates of complex traits in this  
61 scenario. We show that our method powerfully identifies complex trait correlates  
62 across a wide range of parameters that are biologically plausible and experimentally  
63 practical. Furthermore, we show that reference trait analysis can identify  
64 transcripts correlated to a complex trait more accurately than approaches such as  
65 TWAS that use genetic variation to predict gene expression. Reference trait analysis  
66 will contribute to furthering our understanding of variation in complex traits by  
67 identifying molecular correlates of complex traits that are measured in different  
68 individuals.

69

## 70 INTRODUCTION

71

72 A major goal of complex trait analysis is to discover pathways and mechanisms  
73 associated with disease. By definition, these traits exhibit hallmarks of genetic  
74 complexity including pleiotropy, epistasis, and gene-environment interaction.  
75 Genetic mapping is a powerful approach for detecting quantitative trait loci that  
76 influence complex trait variation, but it has limited power for detecting small effect  
77 loci and can suffer from poor mapping resolution, hindering the identification of  
78 causal genes. Moreover, these causal genetic variants do not always reside in  
79 relevant therapeutic targets. Therefore, many systems genetic strategies have  
80 emerged to correlate complex traits directly with molecular phenotypic variation,  
81 with the goal of constructing molecular networks that are correlated with trait  
82 variation from a trait-relevant tissue or cell population.

83

84 Ideally, trait correlation networks are constructed using direct phenotypic  
85 measurements for each member of a population. However, there are wide-ranging  
86 questions for which this approach is infeasible or impossible because it is physically,  
87 technically, or financially impossible to obtain all of the measures in the same  
88 individuals. To refer to phenotypes whose measurement on the same individual is  
89 infeasible or impossible, we will use the term incompatible phenotypes.

90 Incompatible phenotypes arise in common experimental designs such as studies of  
91 susceptibility to exposure effects where the exposure affects physiology (e.g.  
92 predisposition to psychostimulant addiction) or studies of disease that relate early

93 stage changes to late stage outcomes (e.g. early molecular correlates predictive of  
94 Alzheimer's disease risk). Moreover, incompatible phenotypes arise when the  
95 original study population no longer is available but there is a desire to extend the  
96 study to a new set of traits, a situation that is common in human genetic analyses.  
97 Finally, phenotypes could be incompatible for strictly financial or logistical reasons,  
98 for example due to prohibitively high costs of genomic assays in large cohorts,  
99 leading to fractional collection of data on some samples and more thorough  
100 characterization of others.

101

102 One emerging approach for relating gene expression and complex traits measured  
103 in different cohorts of genetically diverse individuals is to exploit genetic variants  
104 that affect gene expression (eQTL) to impute transcript abundance from genotypes  
105 alone (Gamazon *et al.* 2015; Gusev *et al.* 2016a; b; Mancuso *et al.* 2017; Barbeira *et*  
106 *al.* 2017). This enables estimation of the association between imputed gene  
107 expression and complex traits, an approach that has been called a transcriptome-  
108 wide association study (TWAS; Gusev *et al.* 2016a). However, the TWAS approach  
109 suffers from several limitations, most notably a reliance on strong local (presumably  
110 *cis*-acting) eQTL and consequent inability to impute transcript abundance for genes  
111 without detected eQTL. In contrast to using sparse, discrete *genotypes* to impute  
112 per-individual gene expression and infer correlation to complex traits, our approach  
113 uses shared variation across a rich set of quantitative, multidimensional *phenotypes*  
114 to infer gene expression correlates of phenotypic variability.

115

116 Rather than impute gene expression from genetic data, another strategy is to impute  
117 phenotypic data from other phenotypes. Hormozdiari et al. (2016a) used this  
118 approach to impute unmeasured phenotypes in the context of genome-wide  
119 association studies (GWAS; Hormozdiari *et al.* 2016a). Specifically, the method of  
120 Hormozdiari et al. (2016a) uses the correlation structure in one set of traits to  
121 predict a single unmeasured target trait in a second cohort using only phenotypic  
122 data. In the present study, we extend this strategy to multivariate phenotyping and  
123 apply it to transcriptomics, providing a precise transcript-to-trait correlation  
124 approach that can be compared to the TWAS method.

125

126 We outline a simple method, reference trait analysis, to study relations between a  
127 set of complex traits of interest (*target traits*) and a set of high-dimensional  
128 molecular traits obtained in disjoint subsets of individuals. Reference trait analysis  
129 relates these two incompatible, multidimensional sets of phenotypes indirectly  
130 through the use of a shared set of *reference traits* measured in all individuals. Since  
131 target and molecular traits are not measured in the same individuals, direct  
132 comparisons are impossible. Instead, we relate these traits through reference traits.  
133 Reference traits are best chosen with *a priori* knowledge that they share biological  
134 underpinnings with target traits. This relationship between reference and target  
135 traits is exploited to compute scores from reference traits that capture variation in  
136 unmeasured target traits and can be directly related to transcriptional profiles. By  
137 design, our method is robust to the detection of transcript-trait associations for  
138 which the regulation is not genetic or is characterized by multiple weak, indirect

139 genetic effects. Therefore, it captures biological variability associated with both  
140 genetic and environmental sources of vulnerability, and has the potential to identify  
141 molecular networks of complex trait variation even when there is insufficient power  
142 to detect a quantitative trait locus or genome-wide significant SNP association.

143

144 In this study we develop and evaluate the reference trait analysis method using data  
145 from a previously published behavioral study of Diversity Outbred mice (Logan *et*  
146 *al.* 2013). Diversity Outbred mice are genetically unique; consequently, per subject  
147 terminal traits such as brain gene expression can only be obtained in a single  
148 exposure condition. However, the approach we propose can be useful in any  
149 heterogeneous population for which a common reference set of traits is assessed.

150 Our assessment data set consists of multiple measures of anxiety-related traits in a  
151 sample of Diversity Outbred mice, all of whom have been subjected to brain  
152 transcriptional profiling as well as measurements of two sets of related behaviors.

153 We present an overview of our method, use these data to assess sample size  
154 requirements, and quantify the method's reliability across a range of target-  
155 reference trait correlations. Finally, we test whether the reference trait method  
156 more faithfully recovers trait-gene expression correlations than the TWAS  
157 approach.

158

159

160



161 RESULTS AND DISCUSSION

162

163 *Outline of Approach*

164

165 The reference trait analysis procedure is straightforward, and relies on well-  
166 characterized canonical correlation analysis. Beginning with a population of  
167 individuals, reference traits (labeled using the variable  $U$ ) are measured on all  
168 individuals, target traits (labeled with  $V$ ) on the *training* cohort, and high  
169 dimensional molecular traits (labeled with  $M$ ) on the *testing* cohort (Figure 1).  
170 Although target traits and their molecular correlates are of primary interest, the  
171 choice of reference traits is an important aspect of the method. First, as we will  
172 show, the strength of the multivariate relationship between target and reference  
173 traits is a key parameter determining the power to detect trait-transcript  
174 correlations. Second, because our method leverages shared variation between target  
175 and reference traits, it identifies trait-transcript correlations driven by the portion  
176 of target trait variation that is shared with reference traits. For example, studying  
177 addiction-related traits using novelty behaviors as reference traits would be  
178 expected to uncover transcripts associated with addiction behaviors through  
179 biological pathways that also contribute to the etiology of novelty-seeking  
180 behaviors.

181

182 To conduct reference trait analysis, we employ canonical correlation (Hotelling  
183 1936), which can be thought of as a parent analysis of the more familiar multiple

184 regression. A multiple regression of  $Y$  on  $X$  models the relationships between  
185 multiple  $X$  measures  $X_1, X_2, \dots, X_p$  and univariate  $Y$ . In contrast, canonical correlation  
186 reveals the magnitude and nature of relationships between multivariate  $U$  and  $V$ , e.g.  
187  $U_1, U_2, \dots, U_p$  and  $V_1, V_2, \dots, V_q$ . Specifically, canonical correlation identifies linear  
188 combinations of two multivariate measures  $U$  and  $V$  such that the (univariate) linear  
189 combinations of each measure  $\vec{u}$  and  $\vec{v}$ , known as canonical variables, are maximally  
190 correlated. In this study we use canonical correlation to build linear combinations of  
191 reference traits (transforming  $U$  to  $\vec{u}$ ) that maximize shared variance with target  
192 traits ( $V$ ) in the set of training individuals. The possible number of canonical  
193 variables is limited to the size of the smaller of  $U$  and  $V$ , and each successive  
194 covariate captures a diminishing proportion of the shared variance between the  
195 traits. In this study we focus on the first canonical variable,  $\vec{u}_1$  or  $\vec{v}_1$ , which explains  
196 the largest fraction of shared variance between  $U$  and  $V$ . This quantity can be  
197 thought of as a summary of each set of traits analogous to their first principal  
198 component, but rather than being aligned with the axis of maximal variation *among*  
199 a single set of variables, it is aligned in the direction of maximal shared variation  
200 *between* the two sets of traits  $U$  and  $V$ . For datasets with a very large number of  
201 reference and/or target traits (i.e.  $p \gg n$ ), sparse canonical correlation analysis  
202 (Witten and Tibshirani 2009; Wilms and Croux 2016) may reduce over-fitting, but  
203 this situation is not common when relating two sets of traits  $U$  and  $V$  that contain  
204 organism-level phenotypes as opposed to molecular features.

205

206 The analysis of training data defines canonical coefficients that can be used to  
207 compute first canonical variables from individual-level trait data (i.e. transform  $U$  to  
208  $\vec{u}_1$  or  $V$  to  $\vec{v}_1$ ). We use these coefficients learned from the training data (Figure 1, top)  
209 to transform reference trait data from the testing cohort  $U'$ , which projects these  
210 data in the direction of maximal shared variation with target traits. Thus, these  
211 “projected” traits  $\vec{u}'_1$  optimally capture the portion of variation shared between  
212 reference and target traits due to their underlying genetic and environmental  
213 covariation. Projected traits are then compared to high-dimensional genomic  
214 measurements to extract molecular phenotypes in one sample set that co-vary with  
215 target traits from another group (Figure 1, bottom right).

216

217 *Transitive reliability captures global patterns of covariation between incompatible*  
218 *traits*

219

220 Reference trait analysis reveals covariation between molecular phenotypes and  
221 target trait variation. There are many possible applications of this strategy. For  
222 example, in addiction research, many studies evaluate transcriptional response to  
223 drug exposure but are unable to evaluate the predisposing characteristics of a drug  
224 naïve brain that associate with addiction-related behaviors. Using a reference trait  
225 strategy, one can evaluate the transcriptomes of drug naïve brains and relate them  
226 to the response to drug self-administration through a set of reference traits that do  
227 not involve drug exposure. We have previously estimated the association of novelty

228 seeking and drug self-administration in mice, revealing a canonical correlation of  
229 0.61 among these sets of traits (Dickson *et al.* 2015).  
230  
231 To evaluate whether the reference traits strategy could be applied to find  
232 transcriptional correlates of drug self-administration, we used a dataset where  
233 reference, target, and molecular trait profiling were performed on the same  
234 individuals to allow for assessment of the accuracy and robustness of the method. In  
235 this data set, transcriptional profiles, target traits, and reference traits are available  
236 for all individuals. This allows evaluation of the properties of the reference trait  
237 strategy, including robustness and sample size requirements. Specifically, we  
238 studied relationships between two distinct sets of anxiety-related traits and  
239 hippocampal gene expression, where all traits were measured in each of  $N = 258$   
240 Diversity Outbred mice (Logan *et al.* 2013). The anxiety-related traits consisted of  
241 eleven measurements of open-field arena exploration behaviors and five  
242 measurements of light-dark box behaviors (Supplementary Table 1). A canonical  
243 correlation analysis of these two sets of traits yielded a statistically significant  
244 model ( $F_{55,1123.75} = 4.48$ ,  $p < 2 \times 10^{-16}$ , Wilk's  $\lambda = 0.400$ ) that had a first canonical  
245 correlation coefficient of magnitude 0.69. This was higher than all univariate  
246 correlations between open-field and light-dark box traits (median 0.11, maximum  
247 0.65), and similar in magnitude to the shared variation revealed by the first  
248 canonical variable in the motivating analysis of novelty-related behaviors and  
249 cocaine self-administration (Dickson *et al.* 2015). We arbitrarily designated the  
250 open-field traits as target traits and light-dark box traits as reference traits. For

251 reference trait analysis, we hid gene expression data for some mice (training set)  
252 and open-field data for the remaining mice (testing set).

253

254 In this evaluation of reference trait analysis, we know the true values of all hidden  
255 data and can directly evaluate the power of the method to reveal gene expression  
256 patterns associated with target trait variation. Specifically, we estimate canonical  
257 coefficients (weights to calculate canonical variables) from the training set and use  
258 them to calculate projected traits  $\vec{u}'_1$  in the testing set. To quantify the performance  
259 of reference trait analysis when the true answer is known, we computed  
260 correlations in testing set animals between gene expression  $E$  and either (1) the first  
261 projected trait  $\vec{u}'_1$ ,  $\text{cor}(E, \vec{u}'_1)$  or (2) the first canonical variable computed using  
262 hidden target traits  $\vec{v}'_1$ ,  $\text{cor}(E, \vec{v}'_1)$ . The latter quantity, the “truth”, is unavailable in a  
263 real application of reference trait analysis. A set of reference traits that perfectly  
264 captures all variation in target traits would result in a vector of gene expression-  
265 trait correlations that is identical whether the target traits were known or projected  
266 from reference traits (i.e. the reference traits serve as a perfect surrogate for target  
267 traits). We define *transitive reliability* as the correlation between these vectors i.e.  
268  $\text{cor}[\text{cor}(E, \vec{u}'_1), \text{cor}(E, \vec{v}'_1)]$ . High transitive reliability would indicate that strong  
269 correlations between gene expression and target traits are likely to be identified  
270 using projected traits.

271

272 Transitive reliability, estimated using real gene expression data and simulated  
273 canonical variables with known correlation, scales linearly with the magnitude of

274 the canonical correlation coefficient (Figure 2A), confirming our intuition that  
275 greater sharing of variation between target and reference traits increases the utility  
276 of leveraging reference traits to understand target trait variation. We divided the  
277 anxiety dataset into equally sized subsets (partially overlapping for larger sample  
278 sizes) to examine the dependence of transitive reliability on sample size. The  
279 canonical correlation was upwardly biased for small sample sizes ( $N < 90$ ; data not  
280 shown), as has previously been recognized (e.g. Thompson 1990). When we used  
281 Wherry's correction as suggested by Thompson (1990), canonical correlations no  
282 longer depended on sample size (linear model;  $p > 0.8$ ). Overall, transitive reliability  
283 asymptotically approached the magnitude of the canonical correlation coefficient  
284 calculated from the full dataset (Figure 2B, black line), demonstrating that global  
285 patterns of trait-gene expression correlation can be recovered with relatively  
286 modest sample sizes using the reference trait approach. In contrast, weights from  
287 the smallest (fifth) canonical covariate, which captures little shared variation  
288 between datasets, produced low transitive reliabilities (median 0.11).

289

290 *Reference trait analysis successfully identifies known trait correlations*

291

292 Ultimately, the primary goal of reference trait analysis is to identify molecular  
293 correlates of unmeasured phenotypes. To discover these correlates, individual gene  
294 expression levels are correlated to projected traits. To test this strategy, we first  
295 employed reference trait analysis on the anxiety-related phenotype data described  
296 above. After randomly splitting the dataset and withholding open-field data

297 (arbitrarily designated as target traits) in half the individuals, we identified gene  
298 expression levels correlated to projected reference traits. We found high overlap  
299 between the genes most strongly correlated with hidden target trait canonical  
300 variable 1 and those most strongly correlated with projected traits (23% overlap  
301 among genes with top 5% of correlations to each trait, compare to 2.5% expected  
302 overlap;  $p < 1 \times 10^{-15}$ , Fisher's Exact Test). Across all genes, including those with  
303 weaker correlations, we found that the vector of trait-gene expression correlations  
304 computed using reference trait analysis showed significant similarity to the true  
305 correlations ( $p < 0.001$ , permutation test using generalized Jaccard similarity  
306 statistic). Moreover, in contrast to the alternative methods for identifying trait-gene  
307 expression correlations discussed above, some correlations detected using  
308 reference trait analysis involved genes with no significant eQTL (e.g. 42% of top 50  
309 correlations). These genes, which are demonstrably associated with trait variation,  
310 would not be detectable using TWAS type approaches.

311

312 To examine the power and robustness of reference trait analysis across a wide  
313 range of biologically plausible parameter values, we conducted extensive  
314 simulations. We simulated data across a range of sample sizes (100, 200, 300, ...,  
315 1000, 1200, 1400, ..., 2000) and enforced a similar covariance structure to the  
316 observed data. Specifically, data were simulated using observed covariances within  
317 each set of anxiety traits, but we perturbed covariances between the two sets of  
318 traits in order to generate datasets with varying canonical correlations. We then  
319 simulated gene expression levels with known correlation to the first target trait

320 canonical variable,  $\vec{v}_1$  ( $\rho = 0.2, 0.225, 0.25, \dots, 0.9$  with 20 genes each). We simulated  
321 trait data and gene expression data at random for each of 1,000 simulations for each  
322 sample size.

323

324 For each simulation, after hiding target traits in half the individuals and gene  
325 expression data in the other half, we conducted reference trait analysis. We  
326 computed projected reference traits, correlated to gene expression, and quantified  
327 performance as the fraction of true trait-gene expression correlations that were  
328 detected using a 10% false discovery rate (FDR) threshold. For high trait-gene  
329 correlations ( $\rho > 0.6$ ) and strong target-reference trait canonical correlations ( $R =$   
330  $0.7$  or  $0.9$ ), the correlation of interest was essentially always detected (Figure 3). For  
331 lower target-reference trait canonical correlations ( $R = 0.5$ ), even relatively modest  
332 true trait-gene expression correlations (e.g.  $\rho = 0.3$ ) were often detected with  
333 sample sizes above  $\sim 300$  individuals (Figure 3). Thus, reference trait analysis was a  
334 highly effective means for identifying trait-gene expression correlations across a  
335 diverse range of practical sample sizes, typical values for trait-to-gene expression  
336 correlation, and canonical correlation parameters.

337

338 *Comparison of reference trait analysis to related approaches*

339

340 An alternative approach to identifying genes associated with complex traits is to  
341 make use of known genetic variation that regulates gene expression (gene  
342 expression QTL or eQTL). There has been considerable recent interest in methods



343 that integrate complex trait associations and gene expression genetics in order to  
344 identify genes whose expression is associated with trait variation (Nica *et al.* 2010;  
345 Wallace *et al.* 2012; He *et al.* 2013; Gamazon *et al.* 2015; Gusev *et al.* 2016a; Zhu *et*  
346 *al.* 2016; Hormozdiari *et al.* 2016b; Wen *et al.* 2017; Hauberg *et al.* 2017). Several  
347 methods perform tests of the hypothesis that genome-wide association (GWA)  
348 signals and eQTLs are truly colocated versus independent but appearing  
349 colocated due to linkage disequilibrium (Nica *et al.* 2010; Wallace *et al.* 2012;  
350 Giambartolomei *et al.* 2014; Fortune *et al.* 2015; Zhu *et al.* 2016; Hormozdiari *et al.*  
351 2016b; Wen *et al.* 2017; Hauberg *et al.* 2017). Another approach that is more  
352 directly applicable to the experimental designs studied herein is to harness strong  
353 genetic predictors of gene expression variation (eQTL) to impute transcriptomes in  
354 genotyped and phenotyped cohorts, which allows detection of trait-expression  
355 correlations (the TWAS approach; Gamazon *et al.* 2015; Gusev *et al.* 2016a; b;  
356 Mancuso *et al.* 2017; Barbeira *et al.* 2017). TWAS is an approach that is  
357 complementary to reference trait analysis, and has been a particularly powerful  
358 method for discovery of candidate genes driving GWA signals detected in very large  
359 human cohorts (tens or hundreds of thousands of individuals). Supplementary  
360 Figure 1 provides a comparison of genotype, phenotype, and gene expression data  
361 in the reference traits and TWAS strategies. One weakness of the TWAS approach is  
362 that it hinges on the presence of detectable eQTL (typically local, presumably cis-  
363 acting eQTL; but see He *et al.* 2013; Vervier and Michaelson 2016). In humans, even  
364 panels of 1,000 individuals with gene expression measurements only result in a  
365 modest number of genes (500-4,000) with significant *cis*-heritability that can be

366 imputed in the cohort lacking gene expression data (Gusev *et al.* 2016a). In contrast,  
367 reference trait analysis has no requirement for detection of eQTLs, and therefore it  
368 is amenable to detect of correlation of transcripts with complex expression  
369 regulatory mechanisms to traits of similarly complex regulation, and retains  
370 performance across lower sample sizes, as we demonstrate below.

371

372 Although TWAS and reference trait analysis utilize different data types, both are  
373 tools inferring relations between complex traits and transcript abundance, so we  
374 sought to compare their performance on the same dataset. For TWAS, we used  
375 methods implemented in the software suite PrediXcan (Gamazon *et al.* 2015). We  
376 randomly divided our anxiety dataset in half and considered open-field  
377 measurements as target traits. We withheld gene expression measurements in half  
378 the animals; therefore, only genotype and reference trait data were visible for all  
379 animals. We built predictive models of gene expression from the training cohort of  
380 mice, applied these models to impute gene expression in the testing cohort, and  
381 calculated correlations between imputed gene expression and a summary measure  
382 of the target traits (first canonical variable). We conducted 1,000 permutations with  
383 random 50:50 divisions of the anxiety dataset to account for stochastic sampling  
384 effects. For each replicate, we compared global trait-gene expression correlations  
385 for PredictDB-imputed gene expression versus those computed using projected  
386 traits obtained with our new method. In the former case, trait data is available and  
387 gene expression data is imputed, while in the latter case gene expression data is  
388 available and trait data is imputed.

389

390 For direct comparisons between reference trait analysis and TWAS, we ran  
391 reference trait analysis using only genes that were significantly predicted by the  
392 PredictDB module of PrediXcan (FDR < 5%; see Methods). Across the 1,000  
393 permutations, we imputed gene expression for a mean 12,250 genes (range 11,640-  
394 12,750; mean represents ~70% of total 17,539 genes measured), indicating that a  
395 substantial fraction of genes has insufficient local genetic signal for accurate  
396 imputation. An advantage of reference trait analysis is that it is not limited by the  
397 presence of strong eQTL and all genes can be tested for association with projected  
398 reference traits. For each of the 1,000 permutations, we computed the transitive  
399 reliability of TWAS and of reference trait analysis. Reference trait analysis more  
400 accurately captured global patterns of trait-transcript correlation than TWAS  
401 (Figure 4). Specifically, transitive reliability for target trait first canonical covariate-  
402 gene expression correlations was higher using the reference trait approach  
403 (measured gene expression and projected reference traits) compared to the TWAS  
404 approach (imputed gene expression and measured traits) for 92.7% of simulations  
405 (Figure 4; Supplementary Figure 2 shows an example of results from one  
406 permutation). Thus, we show empirically that reference trait analysis outperforms  
407 TWAS in the mouse anxiety dataset.

408

409 In addition to the quantitative comparison of the methods, we sought to determine  
410 which approach provided the best retrieval of known anxiety related genes. To  
411 perform this analysis we made use of GeneWeaver's database of gene sets curated

412 from multiple sources (Baker *et al.* 2016). The top four hundred genes identified  
413 using each analysis method were entered as three gene lists, and each gene list was  
414 compared to every gene set in the GeneWeaver database via Jaccard similarity. For  
415 each, the top 249 similar gene sets were exported, and a rater with expertise in  
416 behavioral neuroscience who was blind to the analysis methods scored a combined  
417 list of all similar gene sets obtained in these three analyses. Gene sets were  
418 categorized discretely based on relevance to anxiety, with categories including  
419 irrelevant, generally relevant to brain or behavior, and specifically relevant to  
420 anxiety. We found that true open-field first canonical variable—gene expression  
421 correlations had highest relevance to anxiety. The top truly correlated genes were  
422 similar to gene sets more relevant to anxiety than those genes identified using  
423 reference traits or those using TWAS ( $p = 0.0065$  and  $p = 1.5 \times 10^{-14}$ , respectively;  
424 two-sided Fisher's Exact Test). Nevertheless, reference trait analysis performed  
425 significantly better than TWAS at identifying genes with similarity to anxiety-  
426 relevant gene sets ( $p = 7.3 \times 10^{-6}$ ).

427

428 Finally, another alternative to relating traits and transcripts between population  
429 cohorts is to make use of polygenic risk predictors trained using genome-wide  
430 genotypes and phenotypes, and applied to individuals with genotypes but missing  
431 phenotypes (in this case, samples with only transcriptional profiles available)  
432 (Makowsky *et al.* 2011; Dudbridge 2013; Wray *et al.* 2013). However, theoretical  
433 considerations and empirical results suggest that this approach generally requires  
434 sample sizes much larger than 1,000 individuals to obtain accurate predictions

435 (Dudbridge 2013). In the context of reference trait analysis, relating complex  
436 reference and target traits that share high canonical correlation implicitly leverages  
437 the common polygenic or omnigenic (Boyle *et al.* 2017) basis of these traits by  
438 making use of all of the information contained in continuous quantitative variation.  
439  
440

441 *Conclusions*

442

443 We have described a general method for exploring trait covariation among  
444 incompatible and independently collected phenotypes studied in disjoint samples of  
445 genetically diverse individuals to extract molecular networks associated with  
446 disease. Our method utilizes canonical correlation analysis, a standard multivariate  
447 statistical method, to relate incompatible phenotypes using a set of reference traits  
448 measured on all individuals. Our analyses demonstrate that this approach performs  
449 well over a range of parameters typically encountered in the study of trait  
450 correlations, and under sample size requirements that are practical to obtain. This  
451 approach can be useful both for capturing global patterns of covariation between  
452 target traits and high-dimensional molecular phenotypes, as well as for identifying  
453 specific molecular correlates to target traits. Our method identifies trait-gene  
454 expression associations and we do not assert that these associations are necessarily  
455 causal, as has been recognized by studies relating GWAS results and eQTL (Gamazon  
456 *et al.* 2015; Gusev *et al.* 2016a; Hauberg *et al.* 2017).

457

458 When will reference trait analysis be a useful tool? Intuitively, and as demonstrated  
459 in Figure 3, large sample sizes, precise trait measurements, and high shared  
460 variance between reference and target traits would allow for the most accurate  
461 estimation of canonical correlation coefficients and high power to detect  
462 correlations to molecular phenotypes. Although our method could be applied in a  
463 wide variety of scenarios, it is likely to be particularly useful for studies of highly

464 complex, polygenic, multidimensional traits (e.g. behavior, physiology, and  
465 morphology) in cohorts of modest size. As with any method that applies information  
466 learned from one cohort to biological measures from another cohort, reference trait  
467 analysis requires the absence of systematic differences (i.e. heterogeneity in  
468 population characteristics) between the training and testing cohorts. For very large  
469 cohorts of individuals where obtaining suitable reference traits may be difficult,  
470 polygenic scores based on either genetic predictors alone or on a combination of  
471 genetic and environmental risk factors (Dudbridge *et al.* 2017) may be a valuable  
472 approach for predicting phenotypic variation in a test cohort that can then be  
473 correlated with molecular networks.

474

475 Although our application of reference trait analysis involves correlations to high  
476 dimensional molecular phenotypes, the method could, in principle, be applied to any  
477 sets of phenotypes that are multivariate in nature. Moreover, the high relative  
478 performance of our method underscores the importance of extensive phenotyping  
479 using quantitative traits rather than relying on binary indicators of disease and  
480 disease-related phenotypes that may mask complex underlying etiologies. We  
481 anticipate that the framework outlined in this study will be increasingly useful as  
482 studies of diverse, genetically unique populations become more widespread. A  
483 useful future extension to this approach would incorporate statistical techniques  
484 such as sparse canonical correlation analysis (Witten and Tibshirani 2009; Wilms  
485 and Croux 2016), which could permit inference in phenome-level studies where the  
486 target or reference traits are high dimensional. Overall, our approach is likely to be

487 particularly important in functional genomics studies, those utilizing post-mortem  
488 subjects, and large population studies in which individuals are unavailable for  
489 further characterization.

490

491

492



493 **Materials and Methods**

494

495 *Mouse rearing and phenotyping*

496

497 Diversity Outbred mice (J:DO, The Jackson Laboratory) are a heterogeneous stock  
498 derived from the same eight founder strains as the Collaborative Cross (Svenson *et*  
499 *al.* 2012; Churchill *et al.* 2012; Gatti *et al.* 2014; Chesler *et al.* 2016). In this study we  
500 used a subset ( $N = 258$ ) of the 283 Diversity Outbred mice studied by Logan *et al.*  
501 (2013) with hippocampal gene expression profiled by RNA-Seq (see below). Mice in  
502 this study were from generations 4 to 5 (G4-G5) of the DO population. Briefly, each  
503 mouse was acclimated to the housing area, and subject to a brief testing battery  
504 which included a 20 minute novel open-field test and a 10 minute light-dark test,  
505 among other common behavioral tasks. The open-field and light-dark tests are used  
506 to measure exploratory activity and approach-avoidance behavior. Many complex  
507 trait measures can be extracted from these tasks. For this analysis, we chose two  
508 sets of informative measures (Supplementary Table 1). Complete details of animal  
509 rearing, husbandry and phenotyping are presented in Logan *et al.* (2013). Mice were  
510 sacrificed using decapitation which was necessary to preserve fresh brain tissue in  
511 the absence of drug or asphyxiation. All procedures and protocols were approved by  
512 The Jackson Laboratory Animal Care and Use Committee, and were conducted in  
513 compliance with the National Institutes of Health Guidelines for the Care and Use of  
514 Laboratory Animals.

515

516 *Genotyping*

517

518 DNA was prepared from tail biopsies and samples were genotyped using the Mouse  
519 Universal Genotyping Array (MUGA) (Morgan *et al.* 2016). We obtained genotypes at  
520 7,802 markers from arrays processed by GeneSeek (Lincoln, NE). We used  
521 intensities from each array to infer the haplotype blocks in each individual DO  
522 genome using a hidden Markov model (Gatti *et al.* 2014).

523

524 *Gene expression profiling*

525

526 Total hippocampal RNA was isolated using the TRIzol® Plus RNA purification kit  
527 (Life Technologies Corp., Carlsbad, CA) with on-column DNase digestion. Samples  
528 for RNA-Seq analysis were prepared using the TruSeq kit (Illumina Inc., San Diego,  
529 CA) according to the manufacturer's protocols and subjected to paired-end 100 base  
530 pair sequencing on the HiSeq 2000 (Illumina) per manufacturer's  
531 recommendations. RNA sequencing was performed in nine sequencing runs with  
532 two technical replicates for each sample, resulting in an averaging sequencing depth  
533 of approximately 24 million reads per sample after pooling technical replicates. To  
534 obtain estimates of gene expression, we aligned reads to individualized diploid  
535 genomes using the bowtie aligner (Langmead *et al.* 2009) and quantified transcript  
536 abundance by allocating multi-mapping reads using the EM algorithm with RSEM (Li  
537 and Dewey 2011) as described in Munger *et al.* (2014). Raw counts in each sample  
538 were normalized to the upper quartile value and transformed to normal scores.

539 *Reference trait analysis*

540

541 We conducted reference trait analysis using R version 3.3.2 (R Core Team 2016).

542 Canonical correlation analysis was carried out using the `cancor` function in base R.

543 We regressed out the effect of sex on each phenotype because it is not of primary

544 interest in this study. An example walk-through of a reference trait analysis and

545 code to carry out the analyses described in this paper are available at

546 [https://daskelly.github.io/reference\\_traits/reference\\_trait\\_analysis\\_walkthrough.ht](https://daskelly.github.io/reference_traits/reference_trait_analysis_walkthrough.html)

547 [ml](https://daskelly.github.io/reference_traits/reference_trait_analysis_walkthrough.html).

548

549 To examine the power and robustness of reference trait analysis, we simulated data

550 with varying sample sizes and canonical correlation coefficients. We based our

551 simulations on the anxiety phenotype data, consisting of open-field exploration and

552 light-dark box behavioral measures. Specifically, for each of 1,000 simulations we

553 started with the covariance matrix computed from five open-field and five light-dark

554 box traits and randomly increased or decreased each of the  $5 \times 5 = 25$  inter-dataset

555 covariances by 20%. We then simulated multivariate normal phenotype data with

556 the specified covariance matrix. This procedure resulted in two multivariate

557 datasets (simulated open-field and light-dark box traits), where the covariance

558 structure *within* each dataset was similar to that in the real data but with different

559 covariances *between* datasets. When a canonical correlation analysis was carried out

560 on each pair of simulated datasets, the magnitude of the first canonical correlation

561 coefficient varied between  $R = 0.35$  and  $R = 0.98$ , due to the variation in inter-  
562 dataset covariances.

563

564 We simulated gene expression traits with exact correlation to the first target trait  
565 canonical variable  $\vec{v}_1$  in the simulated dataset. In order to simulate a random vector  
566 of observations with defined correlation to an existing vector, we took advantage of  
567 the geometric property that the cosine between two mean-centered vectors equals  
568 their correlation. Therefore, a random vector with defined correlation to an existing  
569 vector can be computed by starting with random draws from a normal distribution,  
570 mean-centering, and applying standard linear algebra operations.

571

572 After hiding target traits in half the individuals and gene expression data in the  
573 other half, we conducted reference trait analysis and quantified performance as the  
574 fraction of the time true trait-gene expression correlations were detected using a  
575 10% FDR threshold.  $P$ -values for trait-gene expression correlations were calculated  
576 using a two-sided  $T$  statistic and correlations deemed significant at a 10% FDR were  
577 identified using  $q$ -values (Storey and Tibshirani 2003).

578

579 *Imputing gene expression using TWAS*

580

581 We divided the anxiety dataset in half and considered open-field measurements as  
582 target traits, hiding gene expression measurements for the animals where we did  
583 not hide open-field traits. For the TWAS strategy, our training cohort consisted of

584 animals with genotypes and gene expression data, and our testing cohort consisted  
585 of animals with genotypes and open-field traits (i.e. training/testing labels are  
586 reversed from reference trait analysis, see Supplementary Figure 1). Diversity  
587 Outbred mice are an outbred population with genomic ancestry derived from eight  
588 inbred founder strains. We used methods implemented in R/qtl2 software  
589 (<http://kbroman.org/qtl2/>) to impute single nucleotide polymorphism (SNP)  
590 variation in each mouse from array-based genotypes obtained at coarser resolution  
591 (see above) using known SNP genotypes present in founder haplotypes. This  
592 resulted in genotypes for ~30 million SNPs. Given the limited number of  
593 generations of outbreeding, haplotype blocks in Diversity Outbred mice typically  
594 stretch for megabases (Svenson *et al.* 2012), leading to strong local linkage  
595 disequilibrium (LD). As such, we used PLINK version 1.9 (Purcell *et al.* 2007) to  
596 prune variants in very strong LD in the eight founder strains, using the parameters -  
597 -indep-pairwise 200kb 40kb 0.95. This procedure reduced the number of SNPs to  
598 235,335 with minimal loss of information.

599  
600 To impute gene expression, we used the PredictDB module of PrediXcan (Gamazon  
601 *et al.* 2015) to build predictive models of gene expression from local genotypes  
602 within 10Mb of each gene, with sex included as a covariate. We conducted 1,000  
603 permutations with random 50:50 divisions of the anxiety dataset to account for  
604 stochastic sampling effects. For each replicate we obtained predictive models of  
605 gene expression by running PredictDB on the training cohort and applied them to  
606 the testing cohort in order to impute gene expression. Following Gamazon *et al.*

607 (2015; <https://github.com/hakyimlab/PrediXcan>), we considered only genes with  
608 models that were significantly predictive of gene expression ( $FDR \leq 5\%$ ). Finally, we  
609 calculated correlations between imputed gene expression and a summary measure  
610 of the target traits (first canonical variable) in the testing cohort. Results were  
611 nearly identical whether we correlated to the first canonical variable or first  
612 principal component of the target traits (median transitive reliability 45% vs. 44%),  
613 but correlations to first canonical variable allow for direct comparison with results  
614 from reference trait analysis.

615

616 *Scoring gene sets to assess retrieval of known anxiety-related genes*

617

618 To score gene sets for relevance to anxiety, a rater with expertise in behavioral  
619 neuroscience who was blind to the analysis methods scored a combined list of all  
620 gene sets obtained herein. We assigned a score of zero to irrelevant data sets, a  
621 score of two to gene sets with general brain or behavior relevance, and a score of  
622 four to anxiety relevant data sets in which either the gene set was generated in an  
623 anxiety relevant experiment, the gene set consisted of genes interacting with a  
624 compound known to be anxiolytic or anxiogenic, or the gene set was a Gene  
625 Ontology annotation set with direct biological relevance to anxiety. For compounds,  
626 a single MEDLINE query of the compound name and 'anxiety' was performed and  
627 the results of the query were examined for overall conceptual relevance.

628

629 *Data availability*

630

631 Raw RNA-Seq gene expression data from the hippocampus of 258 Diversity Outbred

632 mice are available from ArrayExpress (accession number XXX). A processed and

633 normalized gene expression matrix is available as Supplementary Dataset 1.

634 Phenotype data acquired via the open-field and light-dark box paradigms are

635 available as Supplementary Datasets 2 and 3.

636

637 **Acknowledgements:** We thank Jackson Laboratory Genome Technologies for

638 assistance with library preparation and sequencing of RNA-Seq samples. We thank

639 Daniel M. Gatti for assistance with processing mouse genotypes and obtaining

640 genotype probabilities for mapping, Juliet Ndukum for implementing an early

641 prototype of the reference trait analysis methodology, and Timothy Reynolds for

642 assistance with the GeneWeaver platform. This study was supported by National

643 Institutes of Health grants R01 DA037927 (EJC), R01 AA018776 (EJC), and P50

644 GM076468 (EJC) and by program funds to EJC from The Jackson Laboratory.

645

646 **Author contributions:**

647 DAS – Conceptualization, Data Curation, Formal Analysis, Methodology, Software,

648 Visualization, Writing

649 NR – Data Curation, Formal Analysis, Software

650 RFR – Investigation, Methodology

651 JHG – Formal Analysis

652 EJC – Conceptualization, Funding Acquisition, Methodology, Project Administration,

653 Supervision, Writing

654



655 **References**

656

657 Baker E., Bubier J. A., Reynolds T., Langston M. A., Chesler E. J., 2016 GeneWeaver:

658 data driven alignment of cross-species genomics in biology and disease.

659 Nucleic Acids Res. 44: D555-559.

660 Barbeira A. N., Dickinson S. P., Torres J. M., Bonazzola R., Zheng J., *et al.*, 2017

661 Exploring the phenotypic consequences of tissue specific gene expression

662 variation inferred from GWAS summary statistics. bioRxiv: 045260.

663 Boyle E. A., Li Y. I., Pritchard J. K., 2017 An Expanded View of Complex Traits: From

664 Polygenic to Omnigenic. Cell 169: 1177–1186.

665 Chesler E. J., Gatti D. M., Morgan A. P., Strobel M., Trepanier L., *et al.*, 2016 Diversity

666 Outbred Mice at 21: Maintaining Allelic Variation in the Face of Selection. G3

667 Bethesda Md 6: 3893–3902.

668 Churchill G. A., Gatti D. M., Munger S. C., Svenson K. L., 2012 The Diversity Outbred

669 mouse population. Mamm. Genome Off. J. Int. Mamm. Genome Soc. 23: 713–

670 718.

671 Dickson P. E., Ndukum J., Wilcox T., Clark J., Roy B., *et al.*, 2015 Association of

672 novelty-related behaviors and intravenous cocaine self-administration in

673 Diversity Outbred mice. Psychopharmacology (Berl.) 232: 1011–1024.

674 Dudbridge F., 2013 Power and Predictive Accuracy of Polygenic Risk Scores. PLOS

675 Genet. 9: e1003348.

- 676 Dudbridge F., Pashayan N., Yang J., 2017 Predictive accuracy of combined genetic  
677 and environmental risk scores. *Genet. Epidemiol.*: 1–16.
- 678 Fortune M. D., Guo H., Burren O., Schofield E., Walker N. M., *et al.*, 2015 Statistical  
679 colocalization of genetic risk variants for related autoimmune diseases in the  
680 context of common controls. *Nat. Genet.* 47: 839–846.
- 681 Gamazon E. R., Wheeler H. E., Shah K. P., Mozaffari S. V., Aquino-Michaels K., *et al.*,  
682 2015 A gene-based association method for mapping traits using reference  
683 transcriptome data. *Nat. Genet.* 47: 1091–1098.
- 684 Gatti D. M., Svenson K. L., Shabalin A., Wu L.-Y., Valdar W., *et al.*, 2014 Quantitative  
685 trait locus mapping methods for diversity outbred mice. *G3 Bethesda Md* 4:  
686 1623–1633.
- 687 Giambartolomei C., Vukcevic D., Schadt E. E., Franke L., Hingorani A. D., *et al.*, 2014  
688 Bayesian Test for Colocalisation between Pairs of Genetic Association Studies  
689 Using Summary Statistics. *PLOS Genet.* 10: e1004383.
- 690 Gusev A., Ko A., Shi H., Bhatia G., Chung W., *et al.*, 2016a Integrative approaches for  
691 large-scale transcriptome-wide association studies. *Nat. Genet.* 48: 245–252.
- 692 Gusev A., Mancuso N., Finucane H. K., Reshef Y., Song L., *et al.*, 2016b Transcriptome-  
693 wide association study of schizophrenia and chromatin activity yields  
694 mechanistic disease insights. *bioRxiv*: 067355.

- 695 Hauberg M. E., Zhang W., Giambartolomei C., Franzén O., Morris D. L., *et al.*, 2017  
696 Large-Scale Identification of Common Trait and Disease Variants Affecting  
697 Gene Expression. *Am. J. Hum. Genet.* 100: 885–894.
- 698 He X., Fuller C. K., Song Y., Meng Q., Zhang B., *et al.*, 2013 Sherlock: Detecting Gene-  
699 Disease Associations by Matching Patterns of Expression QTL and GWAS. *Am.*  
700 *J. Hum. Genet.* 92: 667–680.
- 701 Hormozdiari F., Kang E. Y., Bilow M., Ben-David E., Vulpe C., *et al.*, 2016a Imputing  
702 Phenotypes for Genome-wide Association Studies. *Am. J. Hum. Genet.* 99: 89–  
703 103.
- 704 Hormozdiari F., van de Bunt M., Segrè A. V., Li X., Joo J. W. J., *et al.*, 2016b  
705 Colocalization of GWAS and eQTL Signals Detects Target Genes. *Am. J. Hum.*  
706 *Genet.* 99: 1245–1260.
- 707 Hotelling H., 1936 Relations Between Two Sets of Variates. *Biometrika* 28: 321–377.
- 708 Langmead B., Trapnell C., Pop M., Salzberg S. L., 2009 Ultrafast and memory-efficient  
709 alignment of short DNA sequences to the human genome. *Genome Biol.* 10:  
710 R25.
- 711 Li B., Dewey C. N., 2011 RSEM: accurate transcript quantification from RNA-Seq data  
712 with or without a reference genome. *BMC Bioinformatics* 12: 323.

- 713 Logan R. W., Robledo R. F., Recla J. M., Philip V. M., Bubier J. A., *et al.*, 2013 High-  
714 precision genetic mapping of behavioral traits in the diversity outbred mouse  
715 population. *Genes Brain Behav.* 12: 424–437.
- 716 Makowsky R., Pajewski N. M., Klimentidis Y. C., Vazquez A. I., Duarte C. W., *et al.*,  
717 2011 Beyond Missing Heritability: Prediction of Complex Traits. *PLOS Genet.*  
718 7: e1002051.
- 719 Mancuso N., Shi H., Goddard P., Kichaev G., Gusev A., *et al.*, 2017 Integrating Gene  
720 Expression with Summary Association Statistics to Identify Genes Associated  
721 with 30 Complex Traits. *Am. J. Hum. Genet.* 100: 473–487.
- 722 Morgan A. P., Fu C.-P., Kao C.-Y., Welsh C. E., Didion J. P., *et al.*, 2016 The Mouse  
723 Universal Genotyping Array: From Substrains to Subspecies. *G3 Genes*  
724 *Genomes Genet.* 6: 263–279.
- 725 Munger S. C., Raghupathy N., Choi K., Simons A. K., Gatti D. M., *et al.*, 2014 RNA-Seq  
726 Alignment to Individualized Genomes Improves Transcript Abundance  
727 Estimates in Multiparent Populations. *Genetics* 198: 59–73.
- 728 Nica A. C., Montgomery S. B., Dimas A. S., Stranger B. E., Beazley C., *et al.*, 2010  
729 Candidate Causal Regulatory Effects by Integration of Expression QTLs with  
730 Complex Trait Genetic Associations. *PLOS Genet.* 6: e1000895.

- 731 Purcell S., Neale B., Todd-Brown K., Thomas L., Ferreira M. A. R., *et al.*, 2007 PLINK: a  
732 tool set for whole-genome association and population-based linkage  
733 analyses. *Am. J. Hum. Genet.* 81: 559–575.
- 734 R Core Team, 2016 *R: A Language and Environment for Statistical Computing*. R  
735 Foundation for Statistical Computing, Vienna, Austria.
- 736 Storey J. D., Tibshirani R., 2003 Statistical significance for genomewide studies. *Proc.*  
737 *Natl. Acad. Sci. U. S. A.* 100: 9440–9445.
- 738 Svenson K. L., Gatti D. M., Valdar W., Welsh C. E., Cheng R., *et al.*, 2012 High-  
739 resolution genetic mapping using the Mouse Diversity outbred population.  
740 *Genetics* 190: 437–447.
- 741 Thompson B., 1990 Finding a Correction for the Sampling Error in Multivariate  
742 Measures of Relationship: A Monte Carlo Study. *Educ. Psychol. Meas.* 50: 15–  
743 31.
- 744 Vervier K., Michaelson J. J., 2016 SLINGER: large-scale learning for predicting gene  
745 expression. *Sci. Rep.* 6: 39360.
- 746 Wallace C., Rotival M., Cooper J. D., Rice C. M., Yang J. H. M., *et al.*, 2012 Statistical  
747 colocalization of monocyte gene expression and genetic risk variants for type  
748 1 diabetes. *Hum. Mol. Genet.* 21: 2815–2824.

- 749 Wen X., Pique-Regi R., Luca F., 2017 Integrating molecular QTL data into genome-  
750 wide genetic association analysis: Probabilistic assessment of enrichment  
751 and colocalization. *PLOS Genet.* 13: e1006646.
- 752 Wilms I., Croux C., 2016 Robust sparse canonical correlation analysis. *BMC Syst. Biol.*  
753 10: 72.
- 754 Witten D. M., Tibshirani R. J., 2009 Extensions of Sparse Canonical Correlation  
755 Analysis with Applications to Genomic Data. *Stat. Appl. Genet. Mol. Biol.* 8: 1-  
756 27.
- 757 Wray N. R., Yang J., Hayes B. J., Price A. L., Goddard M. E., *et al.*, 2013 Pitfalls of  
758 predicting complex traits from SNPs. *Nat. Rev. Genet.* 14: 507–515.
- 759 Zhu Z., Zhang F., Hu H., Bakshi A., Robinson M. R., *et al.*, 2016 Integration of summary  
760 data from GWAS and eQTL studies predicts complex trait gene targets. *Nat.*  
761 *Genet.* 48: 481–487.
- 762
- 763

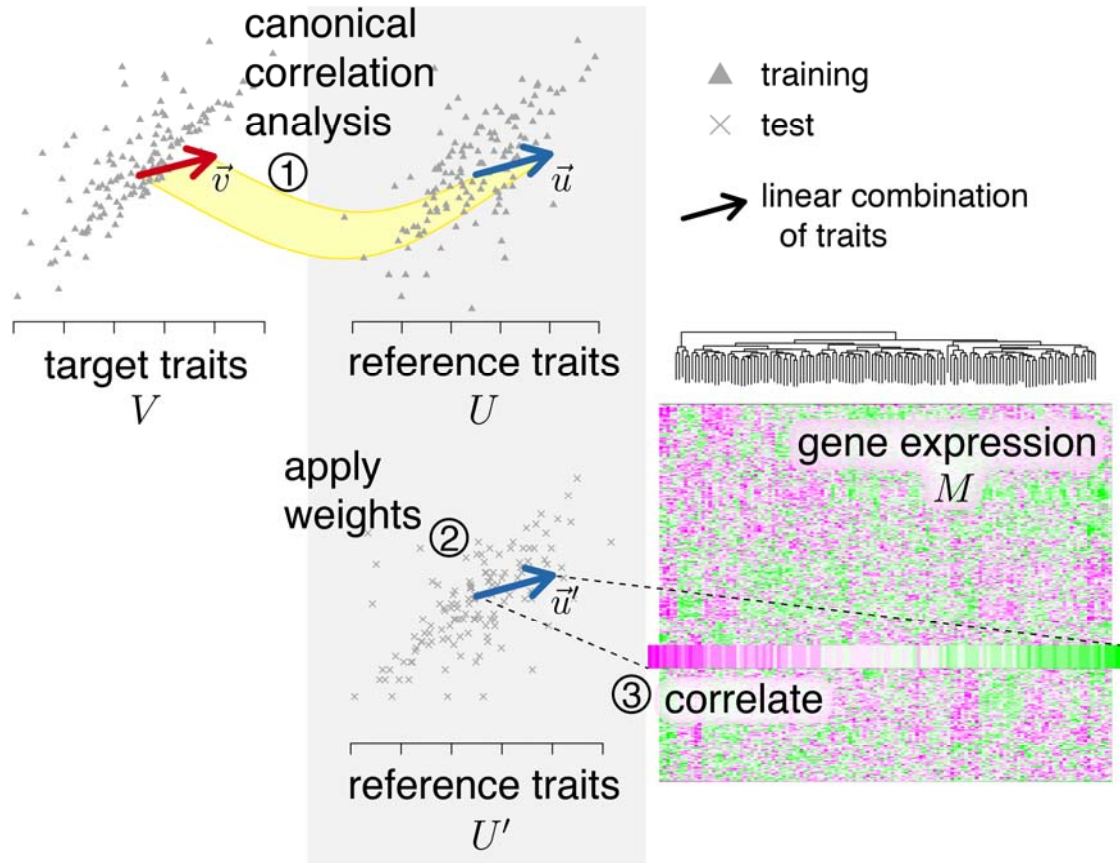

764

765

766 **Figure 1:** Overview of reference trait analysis. Target and reference traits are  
767 measured in a set of training individuals (top plots; grey triangles), while reference  
768 traits and gene expression are measured in test individuals (bottom plots and X  
769 symbols). (1) Canonical correlation is used to identify a linear combination of  
770 reference traits (top blue arrow) that best captures variation in the traits of interest  
771 (red arrow; yellow curve connecting arrows represents canonical correlation  
772 analysis). (2) The weights derived from canonical correlation analysis are applied to  
773 reference traits in the testing population to derive reference trait scores for each  
774 individual (projected reference traits; bottom blue arrow). (3) Projected reference  
775 traits are correlated with molecular phenotypes.

776

777

778

779

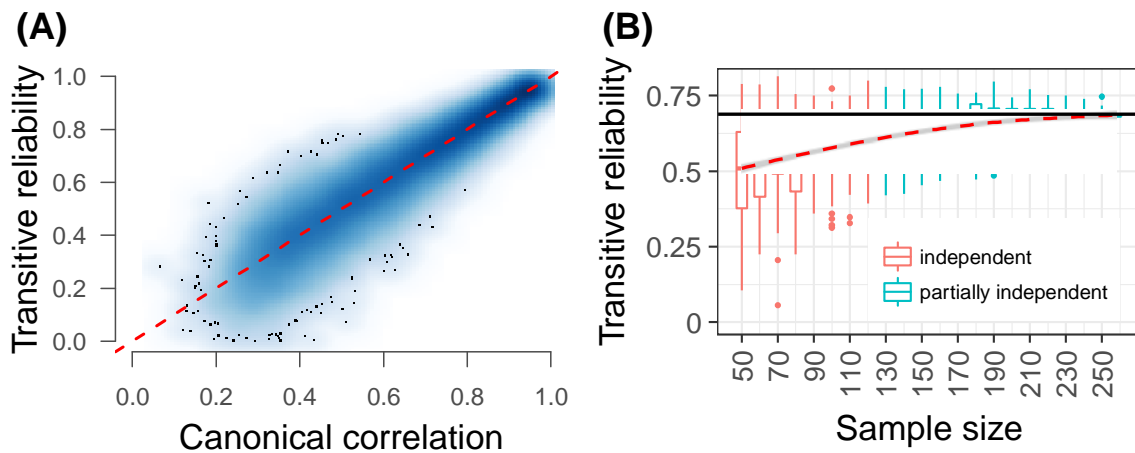

780

781

782 **Figure 2:** Reference trait analysis reveals overall patterns of covariation between  
783 incompatible traits. (A) Relationship between canonical correlation and transitive  
784 reliability. To evaluate the mathematical relationship between these quantities, we  
785 simulated two vectors with known correlation to represent the canonical covariates,  
786 and calculated transitive reliability with real gene expression data. Canonical  
787 correlation shown is absolute value, and transitive reliability is sign-matched. (B)  
788 Sample size increases lead to higher and more precise transitive reliability. Plot  
789 shows transitive reliability estimated using anxiety data with animals subsampled  
790 as described in the main text. Sample size on  $x$ -axis indicates the number of  
791 individuals used in each of the training and testing groups (the number of  
792 individuals phenotyped for target traits and the number with high-dimensional  
793 molecular phenotypes, respectively). Black line indicates magnitude of first  
794 canonical correlation calculated from full dataset. Color indicates whether training  
795 and testing groups were fully or partially independent.

796

797

798



799

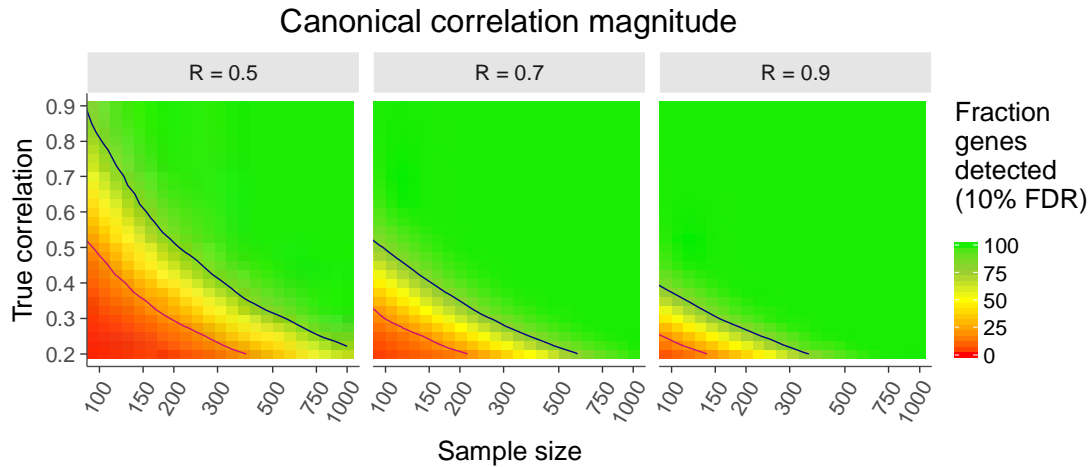

800

801

802 **Figure 3:** Reference trait analysis identifies simulated trait-gene expression  
803 correlations across a wide variety of parameter values. Sample size plotted along  $x$ -  
804 axis is the number of individuals used in each of the training and testing groups  
805 (equal sample size for the two groups, where the training group consists of  
806 individuals phenotyped for target traits and the testing group those with high-  
807 dimensional molecular phenotypes). True correlation ( $y$ -axis) indicates correlation  
808 between first target trait canonical variable ( $\vec{v}_1$ ) and simulated gene expression.  
809 Facets indicate magnitude of canonical correlation coefficient between reference  
810 and target traits ( $R$  listed along grey strips,  $\pm 0.02$ ). Navy and magenta contour lines  
811 depict regions above/below which trait-gene expression correlations are detected  
812  $>80\%$  and  $<20\%$  of the time, respectively.

813

814

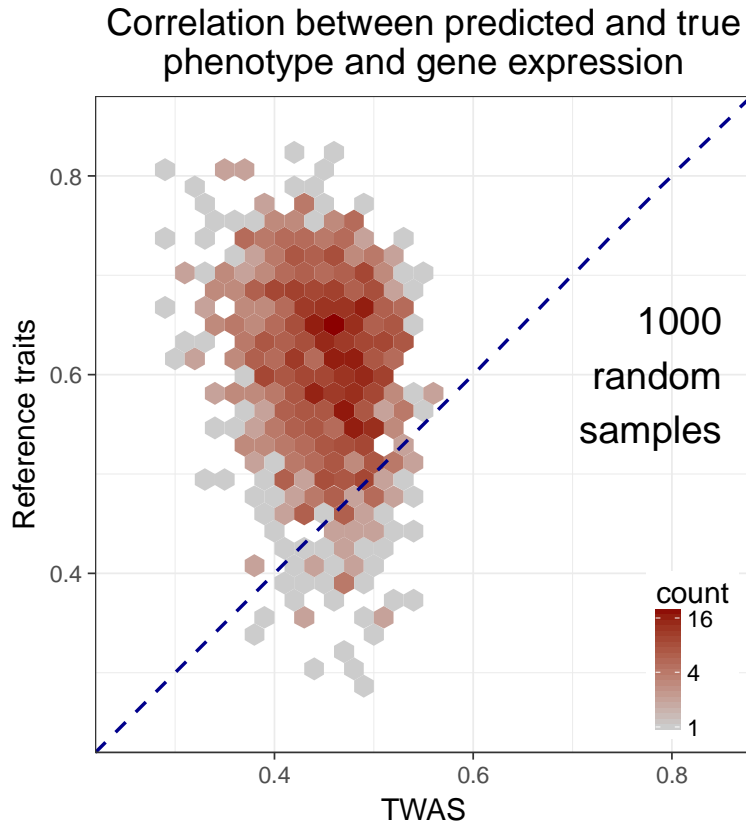

815  
816

817 **Figure 4:** Reference trait analysis recovers true trait-gene expression correlations  
818 more accurately than TWAS. Binned hexagon plot shows the results of 1,000  
819 random samples where the anxiety dataset was split into two halves randomly  
820 designated the training and testing groups. Reference trait analysis and TWAS were  
821 used to recover trait-gene expression correlations. The true values of both the trait  
822 and gene expression are known in this dataset, but were hidden when running  
823 reference trait analysis or TWAS. For each method, the correlation across all genes  
824 between predicted and true values was computed.

825

826 **Supplementary Table 1:** Anxiety-related traits measured on 258 Diversity Outbred  
827 mice used in case study of reference trait analysis.

828

| Group          | Phenotype                                        |
|----------------|--------------------------------------------------|
| Light-dark box | Distance traveled                                |
| Light-dark box | Light-dark transitions                           |
| Light-dark box | Percent time in light (first four minutes)       |
| Light-dark box | Percent time in light (total)                    |
| Light-dark box | Percent time in light, slope                     |
| Open-field     | Distance traveled (first four minutes)           |
| Open-field     | Distance traveled (total)                        |
| Open-field     | Distance change (first - last)                   |
| Open-field     | Percent time in corner                           |
| Open-field     | Percent time in corner, slope                    |
| Open-field     | Percent time in periphery                        |
| Open-field     | Percent time in periphery, slope                 |
| Open-field     | Percent time in center (square-root transformed) |
| Open-field     | Percent time in center, slope                    |
| Open-field     | Percent time mobile                              |
| Open-field     | Fecal boli count                                 |

829

830

831

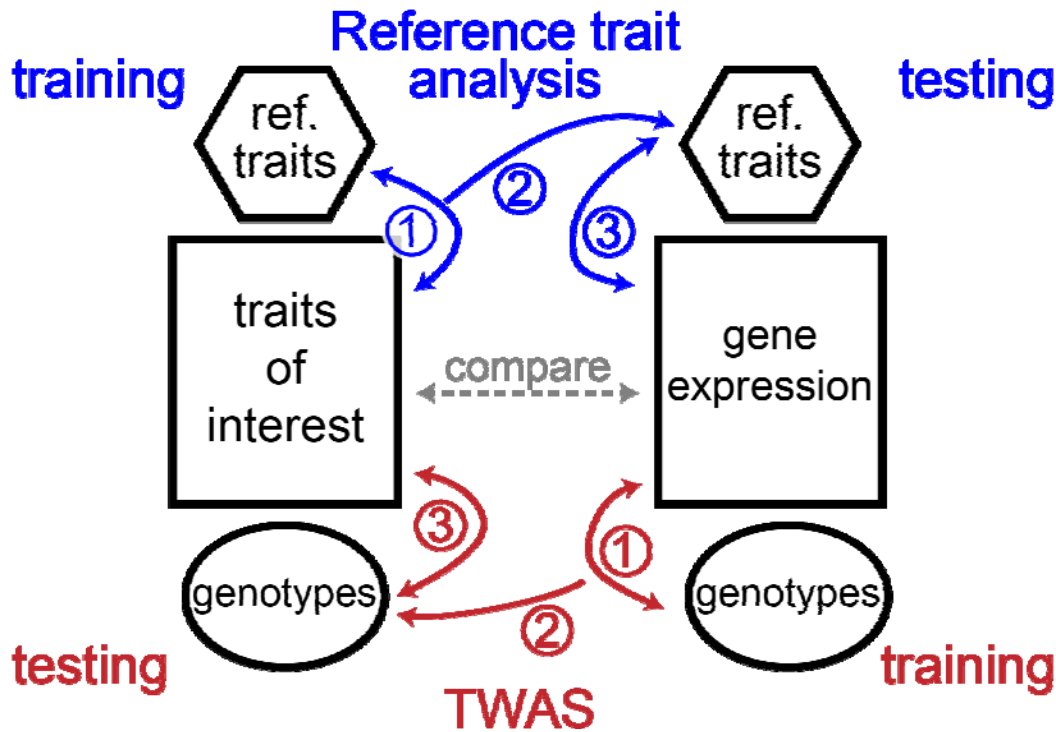

832

833

834 **Supplementary Figure 1:** Schematic comparing overall strategies of reference trait

835 analysis and TWAS. For reference trait analysis, canonical correlation analysis is

836 used to relate traits of interest to reference traits (blue, 1) and coefficients derived

837 from this model are applied to reference traits in the cohort without measurements

838 of traits of interest (blue, 2). Finally, these projected reference traits are compared

839 to gene expression to identify trait-gene expression correlations (blue, 3). In the

840 TWAS approach, genotypes are used to build models that predict gene expression

841 through eQTL (red, 1). These models are applied to genotypes in the cohort without

842 gene expression measurements (red, 2) and imputed gene expression is compared

843 with traits of interest to identify trait-gene expression correlations (red, 3). Note

844 that training and testing cohort labels are switched for the two methods but that the

845 end result of each is to compare traits of interest with gene expression (grey dashed

846 line, middle).

847

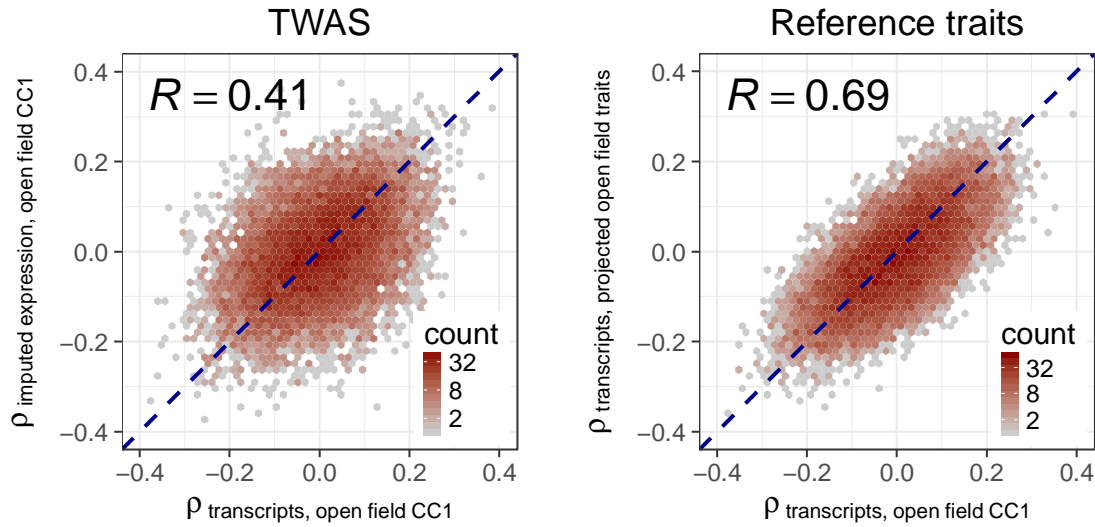

848

849

850 **Supplementary Figure 2:** Comparison of TWAS and reference trait analysis using a  
851 single random division of the mouse anxiety dataset. For both panels we take the  
852 true trait of interest to be the first canonical covariate of open-field traits (open-field  
853 CC1). For TWAS we used genotypes to impute gene expression. Left panel shows  
854 correlation of individual transcripts to the trait of interest, where the  $x$ -axis plots  
855 correlations based on true transcript abundance and the  $y$ -axis plots correlations  
856 based on imputed transcript abundance. Right panel shows the analogous result but  
857 using reference trait analysis, where gene expression is fixed and predictors of  
858 open-field behavior are represented by projected traits.

859

860 **Supplementary Datasets**

861

862 **Supplementary Dataset 1:** Normalized hippocampal gene expression matrix. RNA-  
863 Seq data were processed as described (Methods). To obtain normalized gene  
864 expression matrix, raw counts in each sample were normalized to the upper quartile  
865 value and transformed to normal scores.

866

867 **Supplementary Dataset 2:** Traits derived from open-field arena exploration assay  
868 and used in case study of reference trait analysis. Supplementary Table 1 provides  
869 basic information on phenotypes, while complete details of animal rearing,  
870 husbandry and phenotyping are presented in Logan et al. (2013).

871

872 **Supplementary Dataset 3:** Traits derived from light-dark box behavior assay and  
873 used in case study of reference trait analysis. Supplementary Table 1 provides basic  
874 information on phenotypes, while complete details of animal rearing, husbandry  
875 and phenotyping are presented in Logan et al. (2013).

876
